# Supplementary material
Source: HighWire-hosted journal article supplement (https://jnm.snmjournals.org/highwire/filestream/95031/field_highwire_adjunct_files/0/177659_Supplemental_Data.pdf)
Supplement: 177659_Supplemental_Data.pdf [file 177659_Supplemental_Data.pdf]

SUPPLEMENTAL TABLE 1. Summary of Tracer Specifications

| Tracer QC            | <sup>64</sup> Cu-DOTA-HAC-PD1                                  | <sup>64</sup> Cu-NOTA-HAC-PD1 | <sup>68</sup> Ga-NOTA-HAC-PD1 | <sup>64</sup> Cu-NOTA-HACA-PD1 | <sup>68</sup> Ga-NOTA-HACA-PD1 | <sup>68</sup> Ga-DOTA-HACA-PD |
|----------------------|----------------------------------------------------------------|-------------------------------|-------------------------------|--------------------------------|--------------------------------|-------------------------------|
| Chelates/Tracer      | 0.92±0.01                                                      | 0.74±0.22                     | 0.74±0.22                     | 0.54±0.23                      | 0.54±0.23                      | 0.43±0.10                     |
| Chemical Purity      | > 86.2%                                                        | >90.2%                        | 87.5 %                        | > 85.2%                        | > 85.2%                        | > 91.7%                       |
| Radiochemical Purity | > 98%                                                          | >98%                          | >88%                          | > 87.7%                        | > 87.8%                        | > 87.4%                       |
| SA                   | 4843.8 MBq/μmol                                                | 6199.5 MBq/μmol               | 1832.9 MBq/μmol               | 5822.32 MBq/μmol               | 1455.6 MBq/μmol                | 2162.9 MBq/μmol               |
| Groups               | hPD-L1+ (n=4)<br>hPD-L1- (n=7)<br>Blocking (n=4)<br>Dual (n=5) | hPD-L1+(n=1)<br>Dual (n=2)    | hPD-L1+(n=2)<br>hPD-L1- (n=2) | Dual (n=6)                     | Dual (n=4)                     | Dual (n=3)                    |
| Imaging              | 1,2,4,18,24h                                                   | 1h                            | 1h                            | 1h                             | N/A                            | 1h                            |
| BIOD                 | 1, 24h                                                         | 1h                            | 1h                            | 1h                             | 1h                             | 1h                            |

SUPPLEMENTAL TABLE 2. ImmunoPET Tracer Biodistribution Single Tumor Model

| Organ %ID/g<br>(Mean ± SD) | Cu <sup>64</sup> -DOTA-<br>HAC-PD1<br>(n=3) | Cu <sup>64</sup> -DOTA-<br>HAC-PD1<br>(n=3) | Cu <sup>64</sup> -DOTA-<br>HAC-PD1<br>(n=2, Blocking) | Cu <sup>64</sup> -NOTA-<br>HAC-PD1<br>(n=1) | <sup>68</sup> Ga-NOTA-<br>HAC-PD1<br>(n=2) | <sup>68</sup> Ga-NOTA-<br>HAC-PD1<br>(n=2) |
|----------------------------|---------------------------------------------|---------------------------------------------|-------------------------------------------------------|---------------------------------------------|--------------------------------------------|--------------------------------------------|
| Tumor +                    | 2.1 ± 1.6                                   | NA                                          | 0.9 ± 0.0                                             | 3.0 ± 0.0                                   | 0.9 ± 0.3                                  | NA                                         |
| Tumor-                     | NA                                          | 1.2 ± 0.9                                   | NA                                                    | NA                                          | NA                                         | 0.6 ± 0.0                                  |
| Muscle                     | 2.0 ± 1.7                                   | 0.5 ± 0.1                                   | 1.2 ± 0.4                                             | 0.7 ± 0.0                                   | 0.5 ± 0.2                                  | 0.5 ± 0.2                                  |
| Blood                      | 0.5 ± 0.2                                   | 0.3 ± 0.0                                   | 1.8 ± 1.8                                             | 0.6 ± 0.0                                   | 0.2 ± 0.1                                  | 0.4 ± 0.2                                  |
| Heart                      | 1.4 ± 0.5                                   | 1.3 ± 0.2                                   | 1.7 ± 1.3                                             | 2.2 ± 0.0                                   | 1.1 ± 0.0                                  | 0.8 ± 0.5                                  |
| Lungs                      | 0.9 ± 0.4                                   | 0.9 ± 0.1                                   | 2.5 ± 1.5                                             | 1.2 ± 0.0                                   | 0.7 ± 0.2                                  | 0.5 ± 0.3                                  |
| Liver                      | 16.3 ± 1.7                                  | 17.1 ± 1.0                                  | 15.5 ± 2.3                                            | 15.6 ± 0.0                                  | 4.4 ± 0.8                                  | 4.4 ± 0.0                                  |
| Spleen                     | 9.2 ± 0.8                                   | 3.4 ± 1.2                                   | 8.7 ± 9.1                                             | 5.3 ± 0.0                                   | 2.8 ± 0.1                                  | 2.4 ± 0.6                                  |
| Pancreas                   | 2.6 ± 1.0                                   | 2.2 ± 1.0                                   | 5.8 ± 0.6                                             | 3.5 ± 0.0                                   | 0.7 ± 0.4                                  | 1.1 ± 0.0                                  |
| Stomach                    | 1.9 ± 0.7                                   | 2.7 ± 0.1                                   | 8.5 ± 3.1                                             | 1.7 ± 0.0                                   | 1.0 ± 0.1                                  | 1.0 ± 0.2                                  |
| SI                         | 2.4 ± 0.9                                   | 2.7 ± 1.4                                   | 2.8 ± 1.3                                             | 1.2 ± 0.0                                   | 0.7 ± 0.1                                  | 0.7 ± 0.0                                  |
| LI                         | 3.0 ± 1.4                                   | 1.5 ± 0.7                                   | 3.6 ± 0.5                                             | 1.0 ± 0.0                                   | 1.4 ± 0.8                                  | 2.0 ± 0.5                                  |
| Kidney                     | 73.7 ± 48.5                                 | 84.8 ± 44.0                                 | 43.6 ± 0.9                                            | 76.2 ± 0.0                                  | 67.3 ± 2.1                                 | 49.7 ± 9.1                                 |
| Bone                       | 1.4 ± 0.7                                   | 1.3 ± 0.8                                   | 0.6 ± 0.2                                             | 1.6 ± 0.0                                   | 0.7 ± 0.6                                  | 0.6 ± 0.3                                  |
| BM                         | 0.1 ± 0.0                                   | 0.1 ± 0.0                                   | 0.1 ± 0.0                                             | 0.0 ± 0.0                                   | 0.0 ± 0.0                                  | 0.0 ± 0.0                                  |
| Skin                       | 0.9 ± 0.3                                   | 0.9 ± 0.7                                   | 0.3 ± 0.2                                             | 0.5 ± 0.0                                   | 0.7 ± 0.1                                  | 0.4 ± 0.1                                  |
| Brain                      | 0.1 ± 0.0                                   | 0.1 ± 0.0                                   | 0.1 ± 0.1                                             | 0.0 ± 0.0                                   | 0.0 ± 0.0                                  | 0.0 ± 0.0                                  |

SUPPLEMENTAL TABLE 3. ImmunoPET Tracer Biodistribution Dual Tumor Model

| Organ %ID/g<br>(Mean ± SD) | <sup>64</sup> Cu-DOTA-<br>HAC-PD1<br>(n=3) | <sup>64</sup> Cu-NOTA-<br>HAC-PD1<br>(n=2) | <sup>64</sup> Cu-NOTA-<br>HACA-PD1<br>(n=6) | <sup>68</sup> Ga-NOTA-<br>HACA-PD1<br>(n=4) | <sup>68</sup> Ga-DOTA-<br>HACA-PD1<br>(n=3) |
|----------------------------|--------------------------------------------|--------------------------------------------|---------------------------------------------|---------------------------------------------|---------------------------------------------|
| Tumor +                    | 1.8 ± 0.2                                  | 4.2 ± 0.8                                  | 2.7 ± 1.1                                   | 3.8 ± 1.6                                   | 2.8 ± 1.5                                   |
| Tumor-                     | 0.9 ± 0.7                                  | 3.5 ± 1.7                                  | 0.8 ± 0.4                                   | 1.7 ± 1.3                                   | 0.8 ± 0.1                                   |
| Muscle                     | 0.3 ± 0.1                                  | 1.3 ± 0.4                                  | 0.3 ± 0.1                                   | 0.4 ± 0.3                                   | 0.2 ± 0.1                                   |
| Blood                      | 0.3 ± 0.0                                  | 1.2 ± 0.3                                  | 1.4 ± 0.3                                   | 8.7 ± 4.7                                   | 3.7 ± 0.9                                   |
| Heart                      | 1.8 ± 0.3                                  | 11.7 ± 10.5                                | 0.9 ± 0.2                                   | 2.3 ± 0.8                                   | 1.4 ± 0.5                                   |
| Lungs                      | 0.5 ± 0.2                                  | 2.3 ± 1.1                                  | 2.0 ± 1.1                                   | 3.0 ± 1.7                                   | 1.2 ± 1.1                                   |
| Liver                      | 19.8 ± 2.5                                 | 17.0 ± 5.9                                 | 7.4 ± 4.7                                   | 8.1 ± 0.2                                   | 3.3 ± 0.2                                   |
| Spleen                     | 4.0 ± 3.1                                  | 5.5 ± 1.4                                  | 1.4 ± 0.4                                   | 3.5 ± 0.6                                   | 0.2 ± 0.2                                   |
| Pancreas                   | 1.3 ± 0.3                                  | 3.6 ± 1.1                                  | 1.4 ± 1.5                                   | 1.2 ± 0.4                                   | 0.5 ± 0.3                                   |
| Stomach                    | 1.2 ± 1.0                                  | 3.4 ± 0.8                                  | 1.7 ± 0.6                                   | 2.1 ± 0.5                                   | 1.1 ± 0.4                                   |
| SI                         | 2.0 ± 1.2                                  | 3.5 ± 1.9                                  | 1.8 ± 0.9                                   | 2.1 ± 1.2                                   | 0.7 ± 0.7                                   |
| LI                         | 1.1 ± 0.6                                  | 6.2 ± 1.4                                  | 1.6 ± 0.3                                   | 4.0 ± 0.5                                   | 1.0 ± 0.9                                   |
| Kidney                     | 113 ± 15.7                                 | 55.6 ± 8.3                                 | 96.2 ± 15.5                                 | 20.9 ± 15.4                                 | 55.8 ± 13.4                                 |
| Bone                       | 2.0 ± 0.7                                  | 1.5 ± 1.6                                  | 0.9 ± 0.4                                   | 1.5 ± 0.9                                   | 0.6 ± 0.3                                   |
| BM                         | 0.1 ± 0.0                                  | 0.1 ± 0.0                                  | 1.0 ± 2.3                                   | 0.0 ± 0.0                                   | 0.1 ± 0.0                                   |
| Skin                       | 0.7 ± 0.4                                  | 1.2 ± 0.9                                  | 0.4 ± 0.2                                   | 0.7 ± 0.2                                   | 0.5 ± 0.2                                   |
| Brain                      | 0.1 ± 0.0                                  | 0.1 ± 0.0                                  | 0.1 ± 0.0                                   | 0.1 ± 0.1                                   | 0.1 ± 0.2                                   |

SUPPLEMENTAL TABLE 4. Tumor +: Background Ratios Dual Tumor Model

| Organ<br>(Mean ± SD) | <sup>64</sup> Cu-DOTA-<br>HAC-PD1<br>(n=3) | <sup>64</sup> Cu-NOTA-<br>HAC-PD1<br>(n=2) | <sup>64</sup> Cu-NOTA-<br>HACA-PD1<br>(n=6) | <sup>68</sup> Ga-NOTA-<br>HACA-PD1<br>(n=4) | <sup>68</sup> Ga-DOTA-<br>HACA-PD1<br>(n=3) |
|----------------------|--------------------------------------------|--------------------------------------------|---------------------------------------------|---------------------------------------------|---------------------------------------------|
| Tumor +              | 1.0 ± 0.0                                  | 1.0 ± 0.0                                  | 1.0 ± 0.0                                   | 1.0 ± 0.0                                   | 1.0 ± 0.0                                   |
| Tumor-               | 4.2 ± 4.8                                  | 1.3 ± 0.4                                  | 4.6 ± 3.8                                   | 2.6 ± 0.9                                   | 3.5 ± 2.0                                   |
| Muscle               | 6.8 ± 2.5                                  | 3.4 ± 0.5                                  | 10.3 ± 7.5                                  | 12.3 ± 3.9                                  | 15.2 ± 9.6                                  |
| Blood                | 6.4 ± 1.5                                  | 3.7 ± 0.2                                  | 2.0 ± 0.9                                   | 0.5 ± 0.1                                   | 0.8 ± 0.5                                   |
| Heart                | 1.0 ± 0.1                                  | 0.6 ± 0.6                                  | 3.5 ± 2.1                                   | 1.6 ± 0.5                                   | 2.4 ± 1.6                                   |
| Lungs                | 4.1 ± 1.5                                  | 1.9 ± 0.6                                  | 1.7 ± 1.1                                   | 1.9 ± 2.1                                   | 6.3 ± 7.0                                   |
| Liver                | 0.1 ± 0.0                                  | 0.3 ± 0.0                                  | 0.5 ± 0.4                                   | 0.4 ± 0.2                                   | 0.9 ± 0.5                                   |
| Spleen               | 0.7 ± 0.4                                  | 0.8 ± 0.1                                  | 2.1 ± 1.1                                   | 1.0 ± 0.3                                   | 52.0 ± 61.1                                 |
| Pancreas             | 1.5 ± 0.6                                  | 1.2 ± 0.2                                  | 6.8 ± 9.3                                   | 3.5 ± 2.4                                   | 7.8 ± 5.7                                   |
| Stomach              | 2.2 ± 1.3                                  | 1.2 ± 0.1                                  | 2.0 ± 1.3                                   | 1.8 ± 0.6                                   | 2.9 ± 1.9                                   |
| SI                   | 1.2 ± 0.7                                  | 1.3 ± 0.5                                  | 2.1 ± 1.5                                   | 2.6 ± 1.94                                  | 9.2 ± 7.8                                   |
| LI                   | 2.4 ± 1.8                                  | 0.7 ± 0.0                                  | 1.9 ± 0.9                                   | 0.9 ± 0.4                                   | 5.2 ± 4.1                                   |
| Kidney               | 0.0 ± 0.0                                  | 0.1 ± 0.0                                  | 0.0 ± 0.0                                   | 0.5 ± 0.7                                   | 0.1 ± 0.0                                   |
| Bone                 | 1.0 ± 0.5                                  | 5.0 ± 4.6                                  | 3.8 ± 2.3                                   | 3.4 ± 2.4                                   | 6.8 ± 6.9                                   |
| BM                   | 31.7 ± 21.1                                | 53.6 ± 16.2                                | 73.6 ± 98.1                                 | 119.8 ± 50.0                                | 54.6 ± 38.9                                 |
| Skin                 | 3.1 ± 2.0                                  | 4.5 ± 2.7                                  | 7.5 ± 3.2                                   | 5.8 ± 2.6                                   | 5.9 ± 2.6                                   |
| Brain                | 31.1 ± 8.8                                 | 41.3 ± 10.1                                | 29.4 ± 12.8                                 | 28.9 ± 11.5                                 | 68.2 ± 75.0                                 |

\* Tumor: Background Ratios are calculated for each individual mouse and the reported value is the mean ± SD for the cohort.

### A. Chelates/Binder

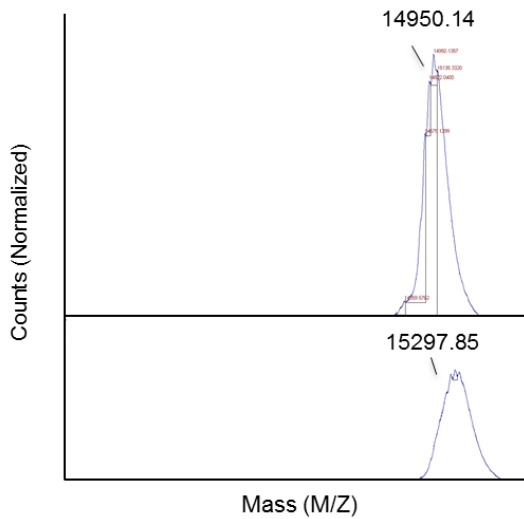

### B. Immunoreactivity

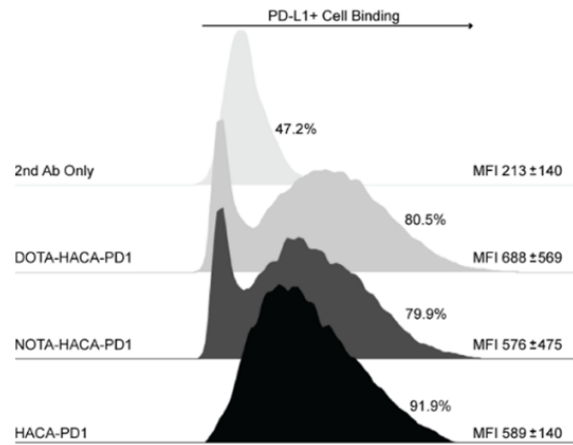

### C. Radiochemical purity

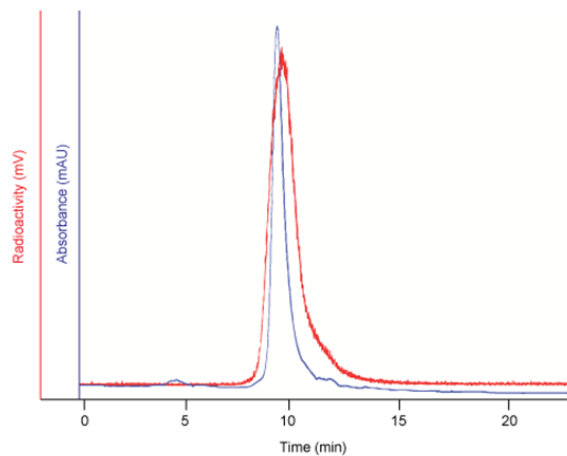

Quality control workflow

*Supplemental Figure 1. Tracer Quality Control.* Representative schematics of: (A) Mass spec determination of number of chelates/ binder. (B) FACS assessment of drop in immunoreactivity after chelation [MFI: median fluorescent intensity] Conjugates were tested for their binding ability on hPD-L1 expressing CT26 cells. Each of the conjugates (200 pM, 100µL) were placed in triplicate vials containing CT26-hPD-L1 cells ( $3 \times 10^5$ ) and kept on ice for 1 h. Cells were washed three times after 1 h with 1%PBSA to remove unbound HACA conjugates. After washing, each of the wells received 100 µL of anti-His-tag-APC antibody for FACS staining and were incubated on ice in the dark. After 1 h cells were washed three times and analyzed by FACS. (C) HPLC assessment of purity and specific activity.

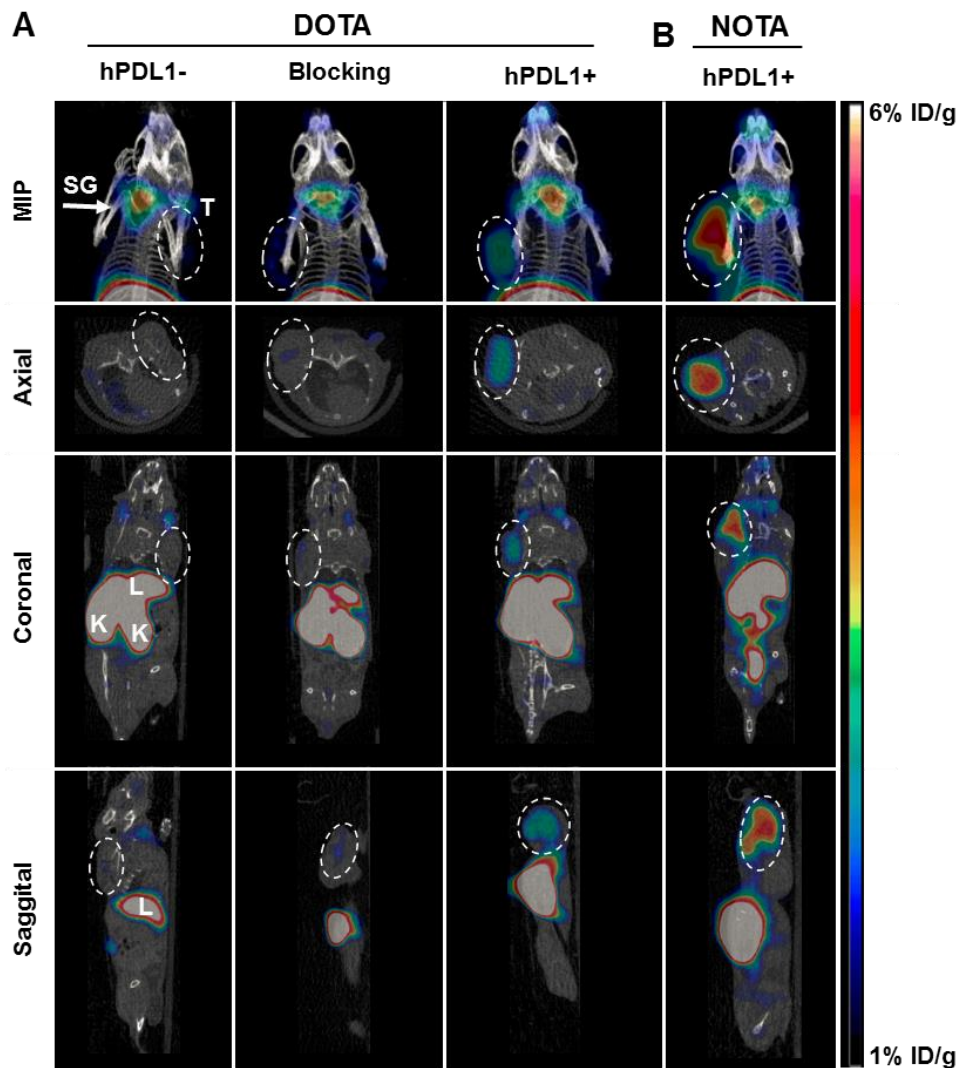

*Supplemental Figure 2.* Human PD-L1 Immune Checkpoint Imaging with  $^{64}\text{Cu}$  Variants in a Single Tumor Model.

MicroPET imaging of hPD-L1 with  $^{64}\text{Cu}$ -DOTA-HAC (A), or  $^{64}\text{Cu}$ -NOTA-HAC (B). From left to right, PET-CT images one hour post injection of tracer (200 $\mu\text{Ci}/25\mu\text{g}/200\mu\text{l}$ ) in NSG mice bearing subcutaneous CT26 hPD-L1(-) tumor, CT26 hPD-L1(+) blocked tumor, or CT26 hPD-L1(+) tumor. Blocking was performed with 500 $\mu\text{g}/200\mu\text{l}$  of unlabeled HAC-PD-1, 2 hours prior to PET tracer. The immunoPET tracer exhibits rapid and highly specific hPD-L1+ tumor uptake which is ideal for potential clinical imaging applications. T-tumor, Li-liver, K-kidneys, SG-salivary glands. Scale bar indicates uptake from 1-6 %ID/g.

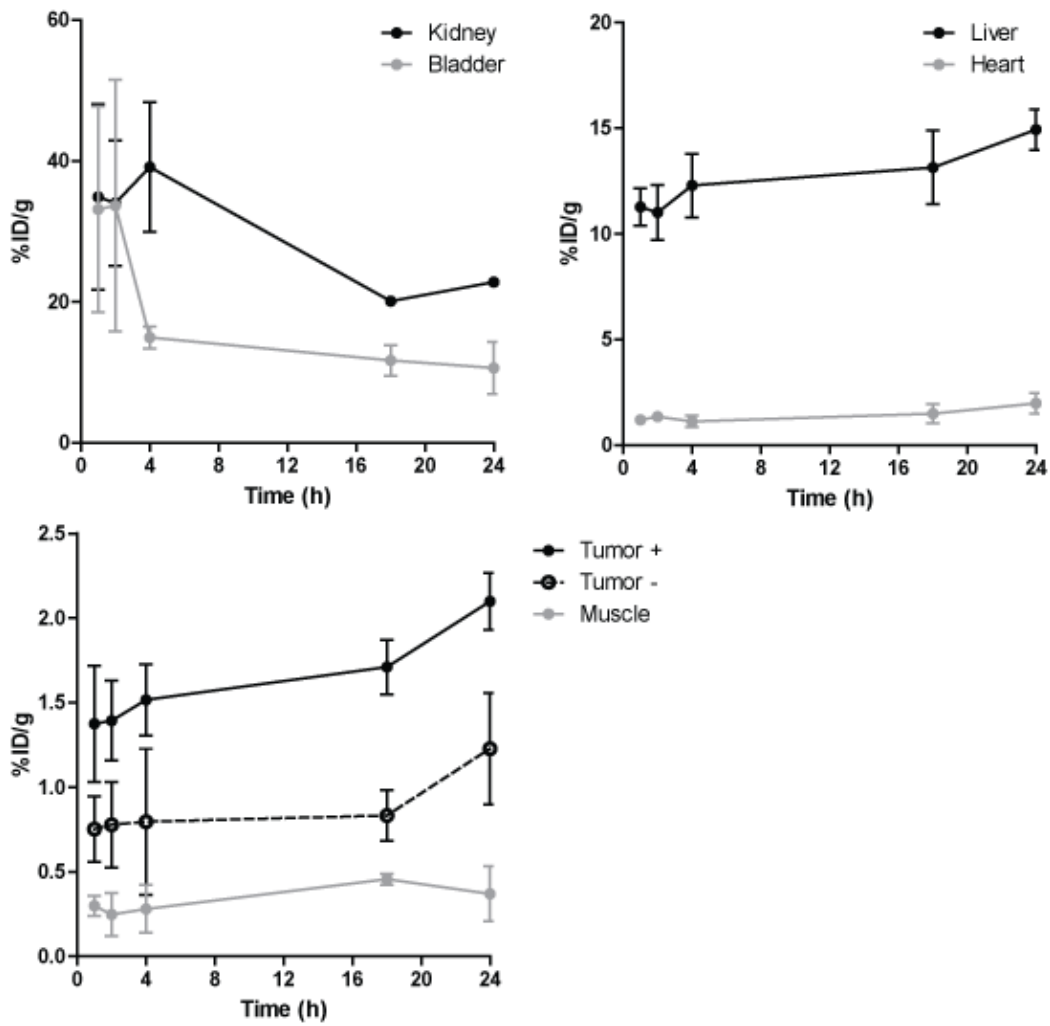

Supplemental Figure 3. Static PET scans at 1, 2, 4, 18 and 24hrs p.i. of  $^{64}\text{Cu}$ -DOTA-HAC-PD1 in NSG mice bearing dual tumors.

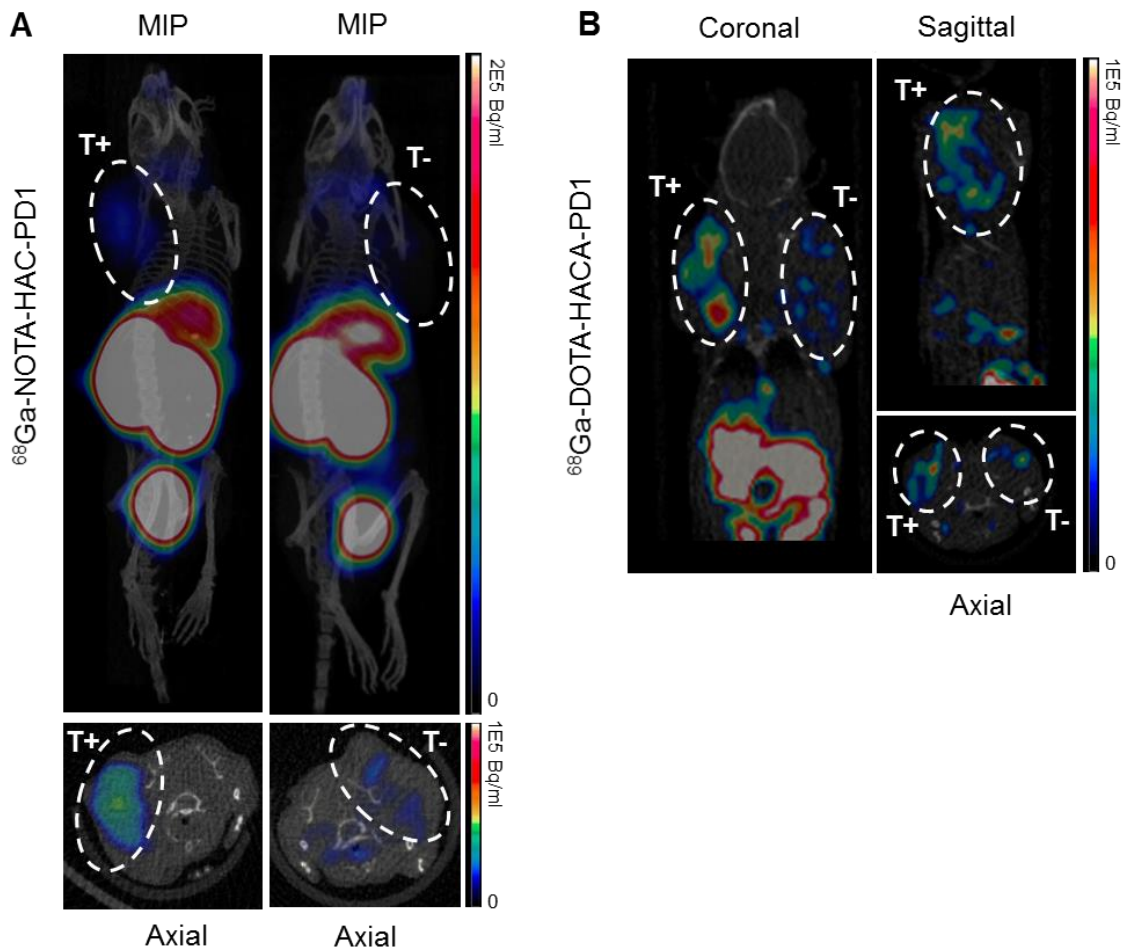

*Supplemental Figure 4.* Human PD-L1 Immune Checkpoint Imaging with  $^{68}\text{Ga}$  Variants. MicroPET imaging of hPD-L1 with  $^{68}\text{Ga-NOTA-HAC}$  (A), or  $^{68}\text{Ga-DOTA-HACA}$  (B) in single and dual tumor bearing mice 1h P.I. respectively. Dashed line demarcates tumor. MIP, Maximum intensity projection; T+, hPD-L1+; T-, hPD-L1-.



*Supplemental Video 1.*  $^{64}\text{Cu}$ -DOTA-HAC-PD1 MIP 1h p.i. (~50  $\mu\text{Ci}/10\ \mu\text{g}/200\ \mu\text{l}$ ) of NSG mouse bearing dual subcutaneous tumors in shoulders (right = hPD-L1+; left = hPD-L1-). Colors represent 1%(blue) – 6%(red) ID/g.

*Supplemental Video 2.*  $^{64}\text{Cu}$ -NOTA-HAC-PD1 MIP 1h p.i. (~50  $\mu\text{Ci}/10\ \mu\text{g}/200\ \mu\text{l}$ ) of NSG mouse bearing dual subcutaneous tumors in shoulders (right = hPD-L1+; left = hPD-L1-). Colors represent 1%(blue) – 6%(red) ID/g.

*Supplemental Video 3.*  $^{64}\text{Cu}$ -NOTA-HACA-PD1 MIP 1h p.i. (~50  $\mu\text{Ci}/10\ \mu\text{g}/200\ \mu\text{l}$ ) of NSG mouse bearing dual subcutaneous tumors in shoulders (right = hPD-L1+; left = hPD-L1-). Colors represent 1%(blue) – 6%(red) ID/g.
